# Supplementary material for: Nitrogen-doped Fe7S8 as highly efficient electrocatalysts for the hydrogen evolution reaction
Source: Royal Society of Chemistry journal article supplement (doi:10.1039/d3cc03376g), 2023-01-01
Supplement: d3cc03376g1.pdf [file d3cc03376g1.pdf]

## Supporting Information

### Nitrogen Doped Fe<sub>7</sub>S<sub>8</sub> as Highly Efficient Electrocatalysts for Hydrogen Evolution Reaction

Jian Ye<sup>#1,2</sup>, Shuwen Niu<sup>#3</sup>, Leijie Zhang<sup>1,4</sup>, Gongming Wang<sup>3</sup>, Junfa Zhu<sup>1,\*</sup>

<sup>1</sup> National Synchrotron Radiation Laboratory, University of Science and Technology of China, Hefei 230029, China

<sup>2</sup> School of Science, Anhui Agricultural University, Hefei 230036, China

<sup>3</sup> Hefei National Laboratory for Physical Science at the Microscale, Department of Chemistry, University of Science and Technology of China, Hefei, Anhui 230026, China

<sup>4</sup> Specreation Instruments Co., Ltd., Hefei, 230026, P. R. China

\*Corresponding author.

E-mail address: jfzhu@ustc.edu.cn (J. F. Zhu)

#### Experimental

##### Sample preparation

The FeOOH sample was obtained by a facile solvothermal method. Firstly, 0.81 g FeCl<sub>3</sub> and 0.8 g NH<sub>4</sub>Cl were put into 50 mL deionized water with strong agitation. After that, the above mixed solution was transferred into a Teflon-linked steel autoclave and kept at 120 °C for 16 h to form FeOOH/CC sample. Then, this sample were further collected and annealed at 600 °C for 1 h in Ar to obtain FeS<sub>2</sub>/CC via using sulfur powder as the sulfur source. Afterwards, the above sample was annealed at 600 °C under 50 sccm NH<sub>3</sub> for 1 h to obtain nitrogen doped Fe<sub>7</sub>S<sub>8</sub> (N-Fe<sub>7</sub>S<sub>8</sub>).

##### Materials characterization

Morphologies and microstructures of FeS<sub>2</sub> and N-Fe<sub>7</sub>S<sub>8</sub> were investigated by using Field emission scanning electron micro-scope (FESEM, Hitachi SU8010) and the transmission electron microscope (TEM, JEOL 2100F). X-ray diffraction (XRD) reactor with Cu K $\alpha$  radiation (Rigaku D/Max-2550) was used to check their phase structure. The X-Ray photoelectron spectroscopy (XPS) spectra and the Fe L-edge NEXAFS experiments were performed at beamline BL10B in the Hefei Light Source of National Synchrotron Radiation Laboratory (NSRL) in Hefei, China. The Fe-K edge X-ray absorption fine structure (XAFS) spectra were obtained in transmission mode on Table XAFS-500 (Specreation Instruments Co., Ltd.).

## Electrochemical measurements

HER performances of the working electrodes were conducted by using an electrochemical workstation (CH Instrument 660D) with a standard three-electrode setup at the temperature of 25 °C, where the carbon rod (D = 8 mm) and saturated calomel electrode (SCE) and were used as the counter electrode and reference electrode respectively. The 1 M KOH solution was used as the electrolyte. The conversion potential of E(RHE) was obtained according to Eq. (1).

$$E(\text{RHE}) = E(\text{SCE}) + 0.059 \times \text{pH} + 0.244 \quad (1)$$

The LSV curves were obtained at a scan rate of 5 mV s<sup>-1</sup>. The Tafel curves were derived by LSV curves. The EIS spectra were obtained by testing at the initial voltage within a frequency range from 100 kHz to 0.01 Hz, where AC amplitude was set as 5 mV. The HER stability test was carried out by a continuous current test at 100 mA cm<sup>-2</sup> for 100 h. These results were revised by IR-compensation. The TOF values were calculated using a previously reported method, where the number of active sites was estimated as the amount of surface sites (including N, Fe and S atoms)<sup>[1]</sup>.

## Density functional theory (DFT) calculations.

The DFT calculations were performed by using the CASTEP program implemented in the Materials Studios package of Accelrys Inc. The electron exchange-correlation potential was treated by Perdew–Burke–Ernzerhof functional (PBE) of generalized gradient approximation (GGA) method<sup>2-3</sup>. The plane-wave kinetic energy cutoff and self-consistent field tolerance were set to 500 eV and  $1.0 \times 10^{-6}$  eV/atom, respectively. The Brillouin zone was sampled by a 2×2×1 and 4×4×1 Monkhorst-Pack mesh k-points for surface structural optimization and density of states (DOS) calculations, respectively. The convergence criterions for geometry optimization were set to  $1 \times 10^{-5}$  eV/atom for energy, 0.03 eV/Å for maximum force and  $1 \times 10^{-3}$  Å for maximum displacement. DFT simulations were performed based on the crystal structures of cubic FeS<sub>2</sub> (a=b=c=5.4179 Å, JCPDS No.42-1340) with space group of Pa-3 and hexagonal Fe<sub>7</sub>S<sub>8</sub> with the space group of P3121. The FeS<sub>2</sub> (001) surface was modeled by a periodic slab repeated in a 2×2 surface unit cell with a vacuum region of 15 Å between the slabs along the Z axis. The N-Fe<sub>7</sub>S<sub>8</sub> (001) model was constructed by replacing a S atom with N in a pristine Fe<sub>7</sub>S<sub>8</sub> (001). The H<sub>2</sub>O absorption energy was calculated by the following equation,  $\Delta E_{\text{H}_2\text{O}} = E_{\text{surf-H}_2\text{O}} - E_{\text{surf}} - E_{\text{H}_2\text{O}}$ , where  $E_{\text{surf-H}_2\text{O}}$  is the total energy of surface covered with a H<sub>2</sub>O molecule,  $E_{\text{surf}}$

is the energy of clean surface, and  $E_{\text{H}_2\text{O}}$  is the energy of a  $\text{H}_2\text{O}$  molecule in gas phase. A complete LST/QST approach was used to determine the transition state of water dissociation.

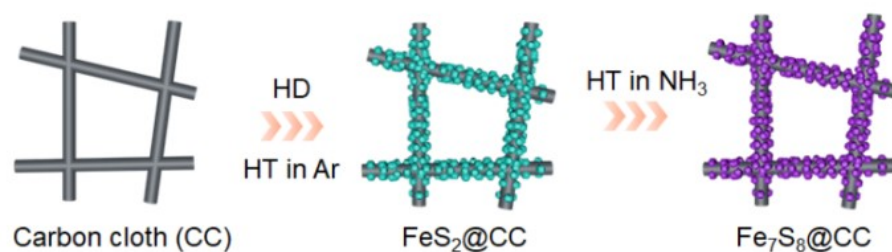

Scheme S1. Simplified schematics of the preparation process of N- $\text{Fe}_7\text{S}_8/\text{CC}$ .

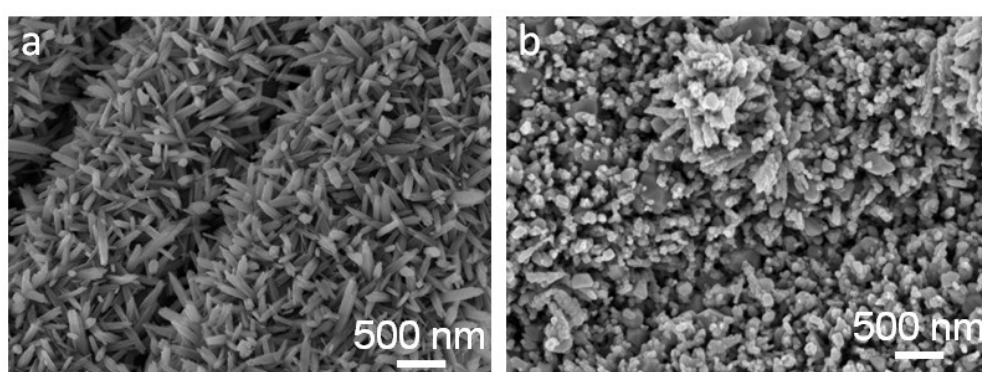

Figure S1. SEM images of (a)  $\text{FeOOH}$  and (b)  $\text{N-Fe}_x\text{S}_y\text{-400}$ .

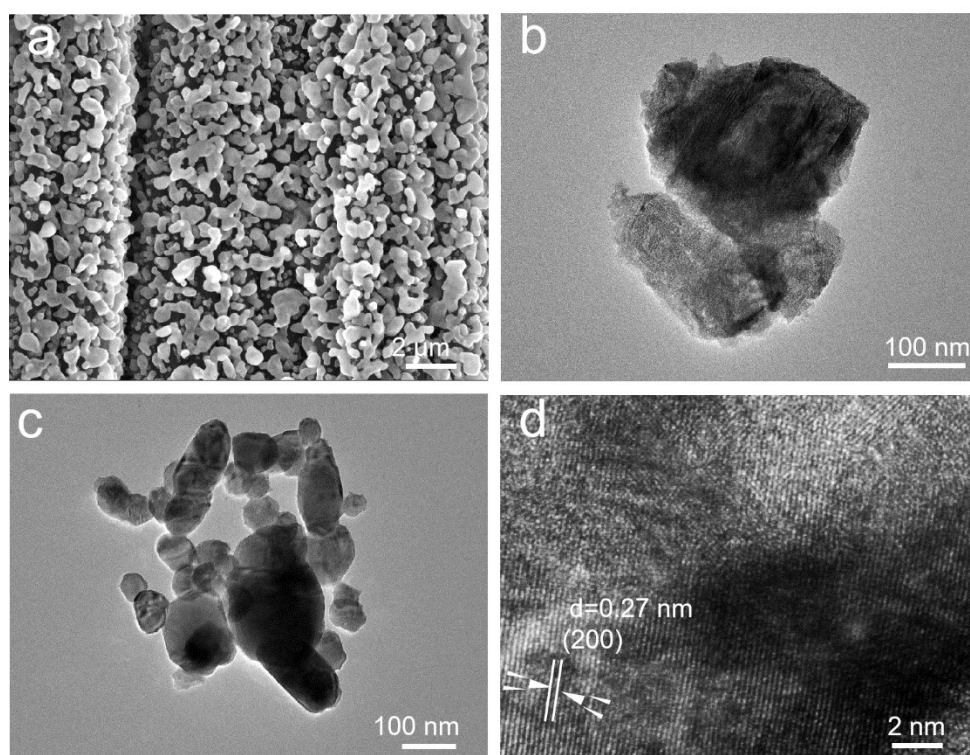

Figure S2. SEM-TEM images of (a, b)  $\text{FeS}_2$  and (c)  $\text{N-Fe}_7\text{S}_8$  samples. (d) HRTEM image of  $\text{FeS}_2$  sample.

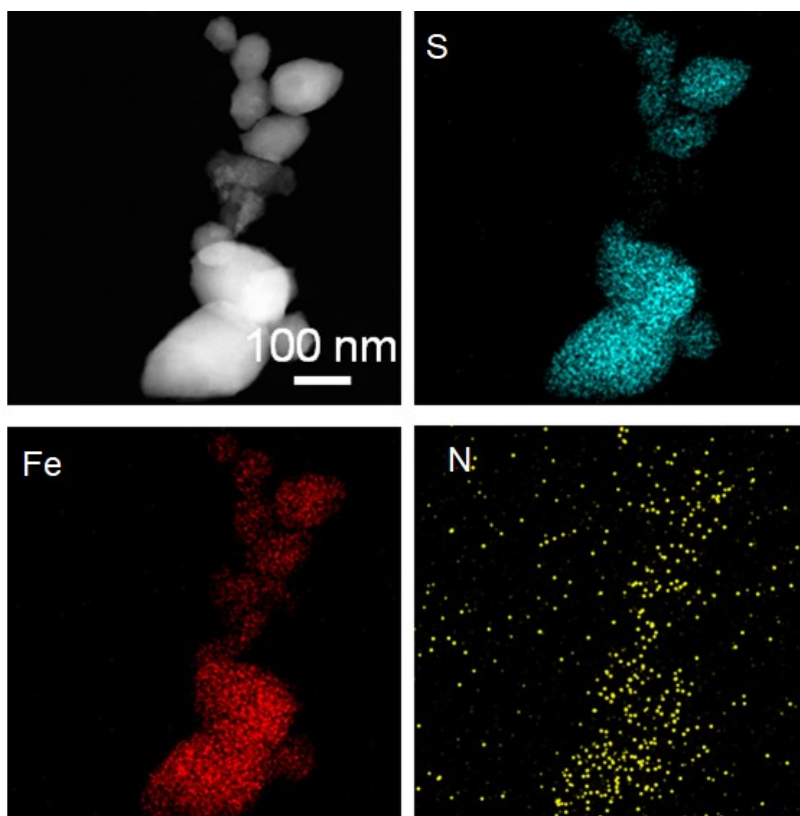

Figure S3. Elemental mapping images of the N-Fe<sub>7</sub>S<sub>8</sub>.

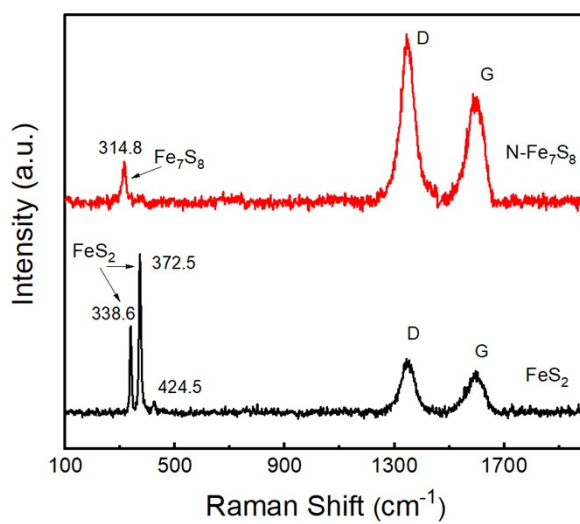

Figure S4. Raman spectra of FeS<sub>2</sub>@CC and N-Fe<sub>7</sub>S<sub>8</sub>@CC.

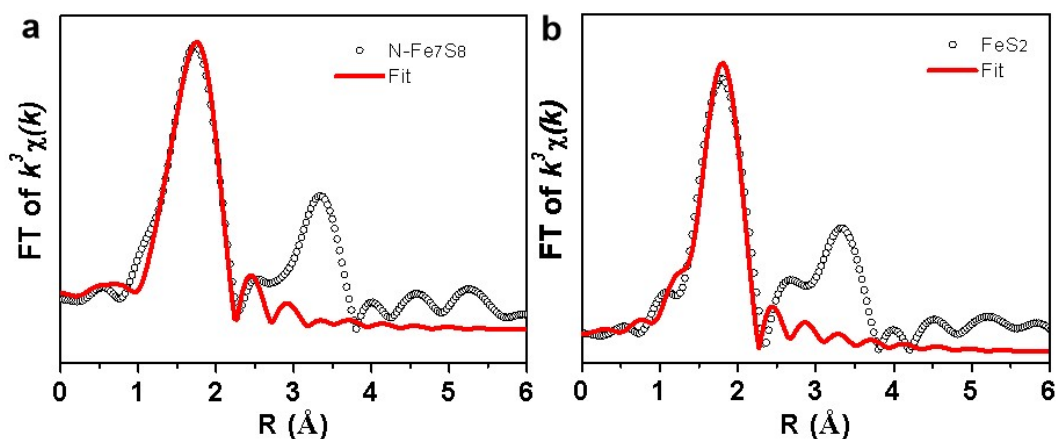

Figure S5. Extended X-ray absorption fine structure spectra and fits in R-space at the Fe K-edge of (a) N-Fe<sub>7</sub>S<sub>8</sub> and (b) FeS<sub>2</sub>

Table S1. EXAFS fitting parameters at the Fe K-edge of FeS<sub>2</sub> and N-Fe<sub>7</sub>S<sub>8</sub> samples samples ( $S_0^2=0.83$ )

| samples                          | path | C. N. <sup>[a]</sup> | R (Å) <sup>[b]</sup> | $\sigma^2 (\times 10^{-3} \text{ \AA}^2)$ <sup>[c]</sup> | $\Delta E$ (eV) <sup>[d]</sup> | R factor <sup>[e]</sup> |
|----------------------------------|------|----------------------|----------------------|----------------------------------------------------------|--------------------------------|-------------------------|
| FeS <sub>2</sub>                 | Fe-S | 4.7                  | 2.26                 | 4.6                                                      | 3.4                            | 0.02                    |
| N-Fe <sub>7</sub> S <sub>8</sub> | Fe-N | 0.2                  | 2.01                 | 7.7                                                      | 7.1                            | 0.02                    |
|                                  | Fe-S | 4.1                  | 2.31                 | 1.2                                                      |                                |                         |

<sup>a</sup>C. N.: coordination numbers; <sup>b</sup>R: bond distance; <sup>c</sup> $\sigma^2$ : Debye-Waller factors; <sup>d</sup> $\Delta E_0$ : the inner potential correction. <sup>e</sup>R factor: goodness of fit.

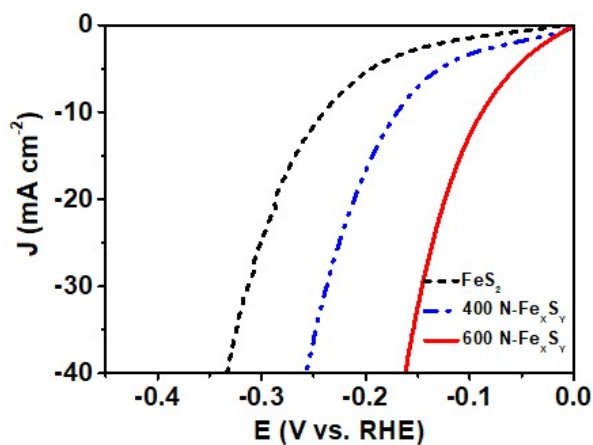

Figure S6. LSV curves FeS<sub>2</sub>, N-Fe<sub>x</sub>S<sub>y</sub>-400 and N-Fe<sub>x</sub>S<sub>y</sub>-600.

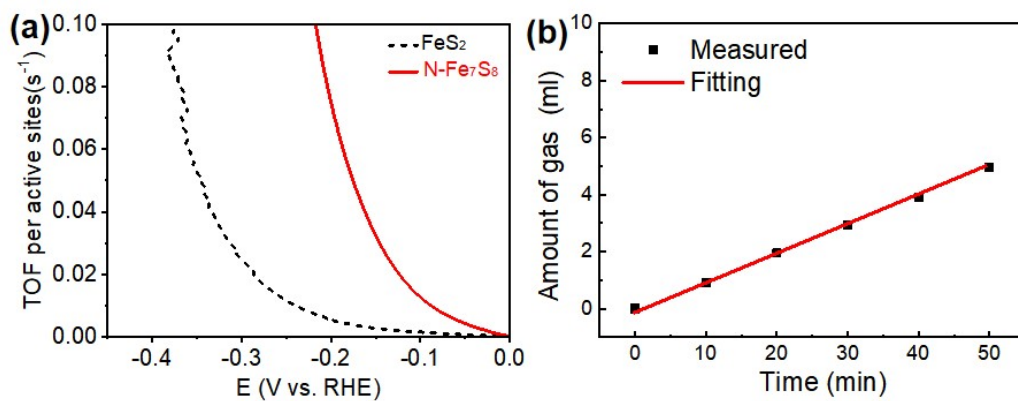

Figure S7. (a) TOF plots of  $\text{FeS}_2$  and  $\text{N-Fe}_7\text{S}_8$  with respect to the overpotential for HER, (b) the amount of theoretically calculated (red line) and experimentally measured gas versus time for  $\text{N-Fe}_7\text{S}_8$  at a constant current density of  $10 \text{ mA cm}^{-2}$ .

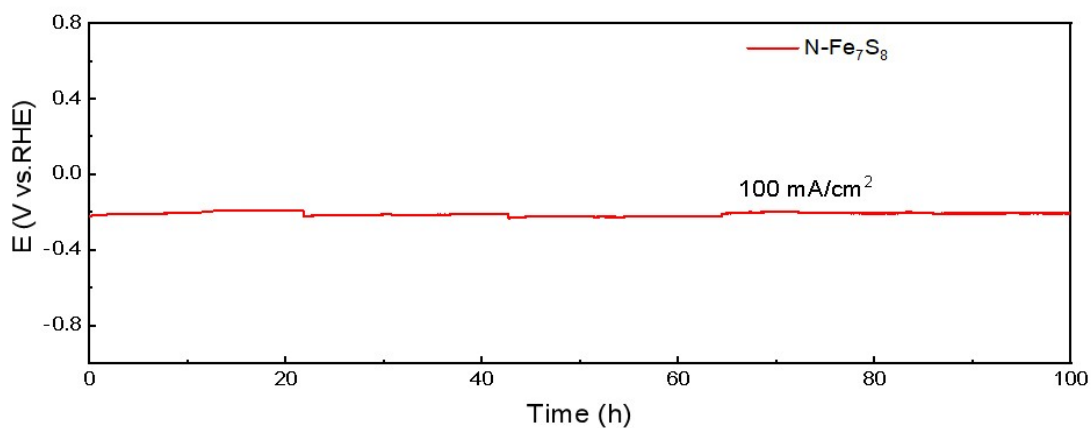

Figure S8. electrochemical stability of the  $\text{N-Fe}_7\text{S}_8@CC$  electrode.

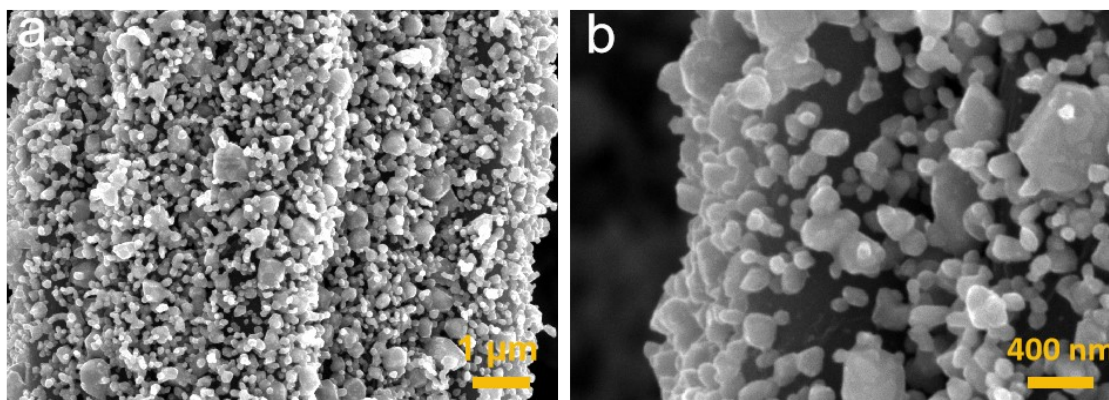

Figure S9. SEM images of  $\text{N-Fe}_7\text{S}_8$  after the stability test.

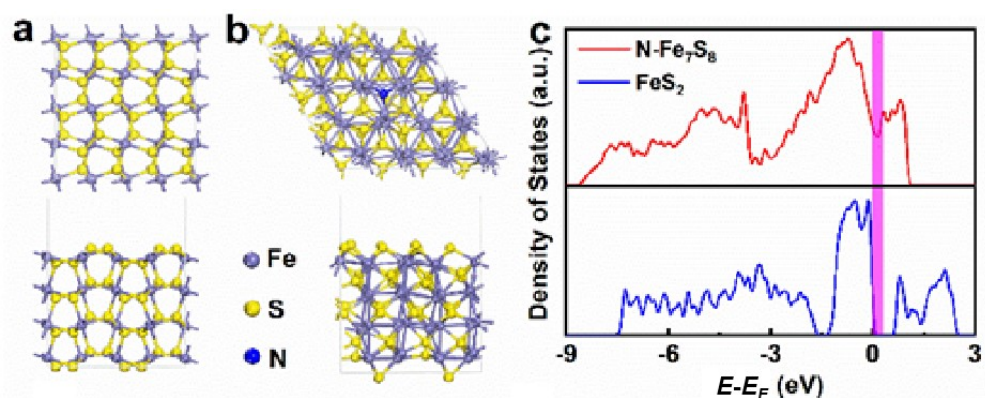

Figure S10. DFT calculation of  $\text{FeS}_2$  and  $\text{N-Fe}_7\text{S}_8$ : (a-b) The optimized surface structures of  $\text{FeS}_2$  and  $\text{N-Fe}_7\text{S}_8$ , respectively. (c) The total density of states (TDOS) of  $\text{FeS}_2$  and  $\text{N-Fe}_7\text{S}_8$ .

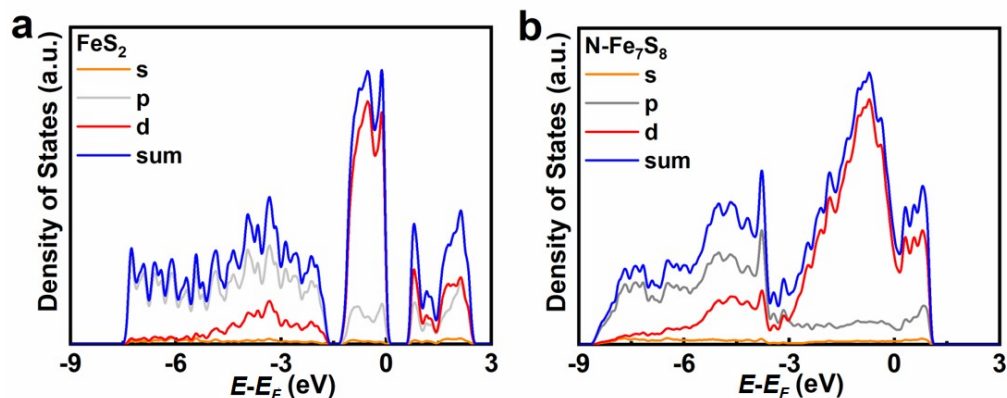

Figure S11. The calculated PDOS distribution of (a)  $\text{FeS}_2$  and (b)  $\text{N-Fe}_7\text{S}_8$ , respectively.

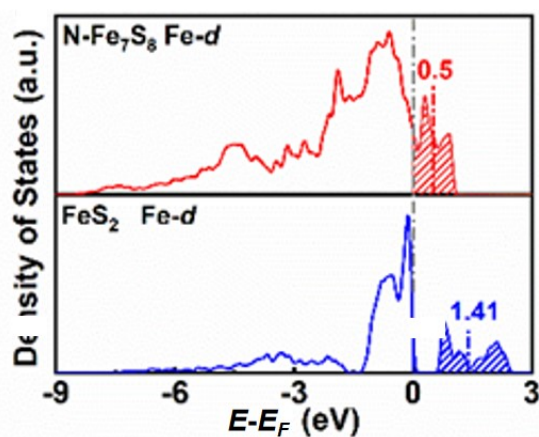

Figure S12. The detailed partial DOS (PDOS) distribution of the Fe d band in  $\text{FeS}_2$  and  $\text{N-Fe}_7\text{S}_8$ .

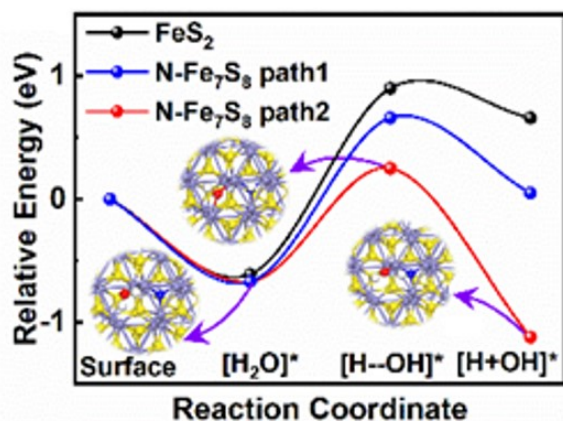

Figure S13. The relative energy diagram with simplified structural information along the reaction coordinate for water adsorption/dissociation on the surface of  $\text{FeS}_2$  and  $\text{N-Fe}_7\text{S}_8$ .

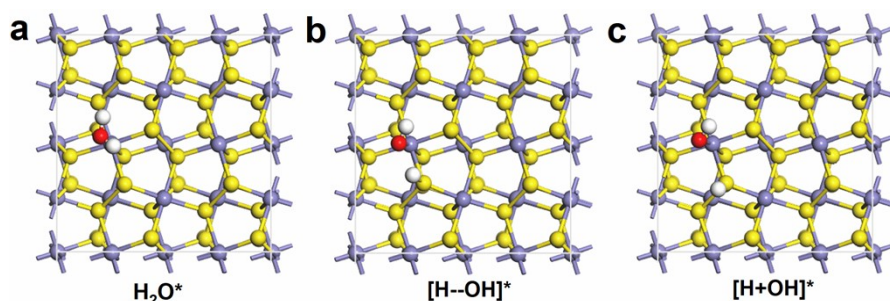

Figure S14. The optimized structural configurations for  $\text{H}_2\text{O}$  adsorption/dissociation on the surface of  $\text{FeS}_2$ .

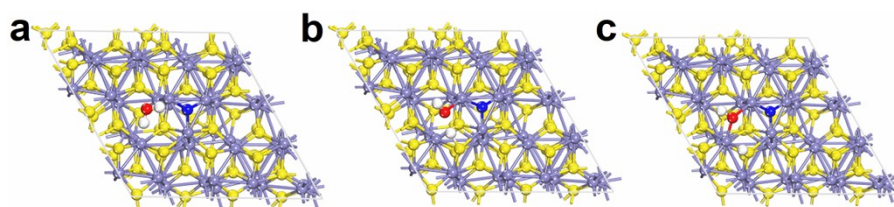

Figure S15. The optimized structural configurations for  $\text{H}_2\text{O}$  adsorption/dissociation on the surface of  $\text{N-Fe}_7\text{S}_8$  (path1).

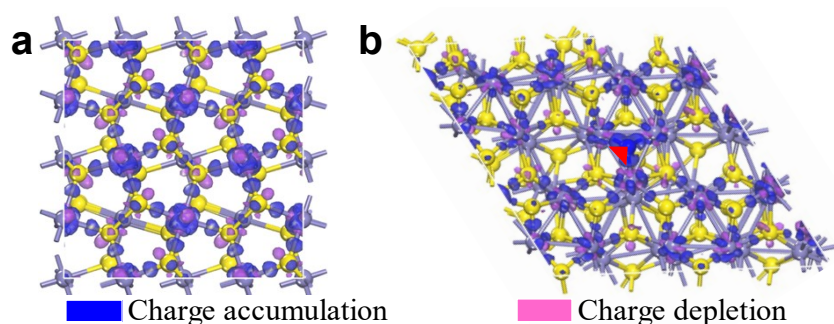

Figure S16. The 3D isosurface of electron density difference images of (a)  $\text{FeS}_2$  and (b)  $\text{N-Fe}_7\text{S}_8$ .



Table S2. A performance comparison with recently published transition metal-based HER catalysts.

| Material                                                             | HER $\eta_{-10}$ (mV) | Tafel slope (mV dec <sup>-1</sup> ) | Ref.      |
|----------------------------------------------------------------------|-----------------------|-------------------------------------|-----------|
| N-Fe <sub>7</sub> S <sub>8</sub>                                     | 89                    | 105                                 | This work |
| FeS/NiS/NF                                                           | 144                   | 39                                  | [4]       |
| FeS/Ni <sub>3</sub> S <sub>2</sub> @NF                               | 130                   | 124                                 | [5]       |
| Ni-Co-P/NF                                                           | 156                   | 108.4                               | [6]       |
| Co <sub>3</sub> S <sub>4</sub> @FNC-Co <sub>3</sub>                  | 140                   | 103                                 | [7]       |
| NiCo <sub>2</sub> S <sub>4</sub> /Ni <sub>3</sub> S <sub>2</sub> /NF | 119                   | 105.2                               | [8]       |
| NF/T(Ni <sub>3</sub> S <sub>2</sub> /MnS-O)                          | 116                   | 41                                  | [9]       |
| $\delta$ -FeOOH/Ni <sub>3</sub> S <sub>2</sub> /NF                   | 106                   | 82.6                                | [10]      |
| Fe-Mo-S/Ni <sub>3</sub> S <sub>2</sub> @NF                           | 141                   | 123                                 | [11]      |
| NiWO <sub>4</sub> /Ni <sub>3</sub> S <sub>2</sub>                    | 136                   | 112                                 | [12]      |
| CuFeS <sub>2</sub> /rGO                                              | 176                   | 216                                 | [13]      |

## Refenerce

1. Y. Wu, X. Liu, D. Han, X. Song, L. Shi, Y. Song, S. Niu, Y. Xie, J. Cai and S. Wu, *Nature communications*, 2018, **9**, 1425.
2. N. Mardirossian and M. Head-Gordon, *The Journal of chemical physics*, 2015, **142**.
3. J. Linnera and A. Karttunen, *Physical Review B*, 2017, **96**, 014304.
4. R. Zhang, Z. Zhu, J. Lin, K. Zhang, N. Li and C. Zhao, *Electrochimica Acta*, 2020, **332**, 135534.
5. H. Li, S. Yang, W. Wei, M. Zhang, Z. Jiang, Z. Yan and J. Xie, *Journal of Colloid and Interface Science*, 2022, **608**, 536-548.
6. Y. Gong, Z. Xu, H. Pan, Y. Lin, Z. Yang and J. Wang, *Journal of Materials Chemistry A*, 2018, **6**, 12506-12514.
7. X. Zhu, J. Dai, L. Li, D. Zhao, Z. Wu, Z. Tang, L.-J. Ma and S. Chen, *Carbon*, 2020, **160**, 133-144.
8. H. Liu, X. Ma, Y. Rao, Y. Liu, J. Liu, L. Wang and M. Wu, *ACS applied materials & interfaces*, 2018, **10**, 10890-10897.
9. Y. Zhang, J. Fu, H. Zhao, R. Jiang, F. Tian and R. Zhang, *Applied Catalysis B: Environmental*, 2019, **257**, 117899.
10. X. Ji, C. Cheng, Z. Zang, L. Li, X. Li, Y. Cheng, X. Yang, X. Yu, Z. Lu and X. Zhang, *Journal of Materials Chemistry A*, 2020, **8**, 21199-21207.
11. Y. Zhang, H. Guo, X. Li, J. Du, W. Ren and R. Song, *Chemical Engineering Journal*, 2021, **404**, 126483.
12. S. Huang, Y. Meng, Y. Cao, F. Yao, Z. He, X. Wang, H. Pan and M. Wu, *Applied Catalysis B: Environmental*, 2020, **274**, 119120.
13. S. Swathi, R. Yuvakkumar, G. Ravi, M. Thambidurai, H. D. Nguyen and D. Velauthapillai, *ACS Applied Nano Materials*, 2023, **6**, 6538-6549.
